# Supplementary material for: Fibronectin and Periostin as Prognostic Markers in Ovarian Cancer
Source: PubMed Central journal article supplement (PMC7016975; doi:10.3390/cells9010149), 2020-01-08
Supplement: cells-09-00149-s001.pdf [file cells-09-00149-s001.pdf]

## Supplementary Materials

### Fibronectin and periostin as prognostic markers in ovarian cancer

Table S1. Association between fibronectin expression and clinico-pathological features ( $\chi^2$  test).

| Characteristics                               | Number of patients |       | FN1 expression           |       |                              |       |                            |       | p-value |
|-----------------------------------------------|--------------------|-------|--------------------------|-------|------------------------------|-------|----------------------------|-------|---------|
|                                               | n                  | %     | weak<br>(n=16,<br>14.8%) |       | moderate<br>(n=64,<br>59.3%) |       | strong<br>(n=28,<br>25.9%) |       |         |
|                                               | n                  | %     | n                        | %     | n                            | %     | n                          | %     |         |
| <b>Age</b>                                    |                    |       |                          |       |                              |       |                            |       |         |
| ≤ 54 years                                    | 56                 | 51.85 | 10                       | 17.86 | 34                           | 60.71 | 12                         | 21.43 | 0.433   |
| > 54 years                                    | 52                 | 48.15 | 6                        | 11.54 | 30                           | 57.69 | 16                         | 30.77 |         |
| <b>Residual disease</b>                       |                    |       |                          |       |                              |       |                            |       |         |
| No                                            | 17                 | 15.74 | 4                        | 23.53 | 8                            | 47.06 | 5                          | 29.41 | 0.441   |
| Yes                                           | 91                 | 84.26 | 12                       | 13.19 | 56                           | 61.54 | 23                         | 25.27 |         |
| <b>Grade*</b>                                 |                    |       |                          |       |                              |       |                            |       |         |
| G3                                            | 76                 | 71.70 | 10                       | 13.16 | 45                           | 59.21 | 21                         | 27.63 | 0.559   |
| G4                                            | 30                 | 28.30 | 6                        | 20.00 | 18                           | 60.00 | 6                          | 20.00 |         |
| <b>Platinum sensitivity</b>                   |                    |       |                          |       |                              |       |                            |       |         |
| Highly sensitive (DFS > 24 mths)              | 22                 | 20.37 | 5                        | 22.73 | 10                           | 45.45 | 7                          | 31.82 | 0.285   |
| Moderately sensitive (24 mths > DFS > 6 mths) | 42                 | 38.89 | 8                        | 19.05 | 25                           | 59.52 | 9                          | 21.43 |         |
| Resistant (DFS < 6 mths)                      | 44                 | 40.74 | 3                        | 6.82  | 29                           | 65.91 | 12                         | 27.27 |         |
| <b>TP53 Accumulation</b>                      |                    |       |                          |       |                              |       |                            |       |         |
| -                                             | 40                 | 37.04 | 7                        | 17.50 | 23                           | 57.50 | 10                         | 25.00 | 0.834   |
| +                                             | 68                 | 62.96 | 9                        | 13.24 | 41                           | 60.29 | 18                         | 26.47 |         |
| <b>CHT response</b>                           |                    |       |                          |       |                              |       |                            |       |         |
| CR                                            | 74                 | 68.52 | 13                       | 17.57 | 43                           | 58.11 | 18                         | 24.32 | 0.415   |
| PR                                            | 31                 | 28.70 | 2                        | 6.45  | 19                           | 61.29 | 10                         | 32.26 |         |
| NC or P                                       | 3                  | 2.78  | 1                        | 33.33 | 2                            | 66.67 | 0                          | 0.00  |         |
| <b>Growth type</b>                            |                    |       |                          |       |                              |       |                            |       |         |
| Papillary                                     | 17                 | 15.74 | 0                        | 0.00  | 10                           | 58.82 | 7                          | 41.18 | 0.308   |
| Solid                                         | 34                 | 31.48 | 6                        | 17.65 | 20                           | 58.82 | 8                          | 23.53 |         |
| Mixed                                         | 57                 | 52.78 | 10                       | 17.54 | 34                           | 59.65 | 13                         | 22.81 |         |
| <b>Mitotic activity</b>                       |                    |       |                          |       |                              |       |                            |       |         |
| 1 (0-9/10HPF)                                 | 11                 | 10.19 | 1                        | 9.09  | 6                            | 54.55 | 4                          | 36.36 | 0.542   |
| 2 (10-24/10HPF)                               | 25                 | 23.15 | 3                        | 12.00 | 13                           | 52.00 | 9                          | 36.00 |         |
| 3 (> 24/10HPF)                                | 72                 | 66.67 | 12                       | 16.67 | 45                           | 62.50 | 15                         | 20.83 |         |

| Characteristics                                                                                                                              | Number of patients |       | FN1 expression           |       |                              |       |                            |       | p-value           |
|----------------------------------------------------------------------------------------------------------------------------------------------|--------------------|-------|--------------------------|-------|------------------------------|-------|----------------------------|-------|-------------------|
|                                                                                                                                              |                    |       | weak<br>(n=16,<br>14.8%) |       | moderate<br>(n=64,<br>59.3%) |       | strong<br>(n=28,<br>25.9%) |       |                   |
|                                                                                                                                              | n                  | %     | n                        | %     | n                            | %     | n                          | %     |                   |
| <b>Source of tumor sample</b>                                                                                                                |                    |       |                          |       |                              |       |                            |       |                   |
| Ovary (O)                                                                                                                                    | 39                 | 36.11 | 8                        | 20.51 | 23                           | 58.97 | 8                          | 20.51 | 0.112             |
| Tumor (T)                                                                                                                                    | 33                 | 30.56 | 7                        | 21.21 | 19                           | 57.58 | 7                          | 21.21 |                   |
| Peritoneum (P)                                                                                                                               | 36                 | 33.33 | 1                        | 2.78  | 22                           | 61.11 | 13                         | 36.11 |                   |
| O + T                                                                                                                                        | 72                 | 66.67 | 15                       | 20.83 | 42                           | 58.33 | 15                         | 20.83 | <b>0.024</b>      |
| P                                                                                                                                            | 36                 | 33.33 | 1                        | 2.78  | 22                           | 61.11 | 13                         | 36.11 |                   |
| <b>Inflammatory infiltration</b>                                                                                                             |                    |       |                          |       |                              |       |                            |       |                   |
| Weak                                                                                                                                         | 81                 | 75.00 | 14                       | 17.28 | 44                           | 54.32 | 23                         | 28.40 | 0.18              |
| Moderately + Strong                                                                                                                          | 27                 | 25.00 | 2                        | 7.41  | 20                           | 74.07 | 5                          | 18.52 |                   |
| <b>Degree of desmoplastic reaction</b>                                                                                                       |                    |       |                          |       |                              |       |                            |       |                   |
| 1                                                                                                                                            | 51                 | 47.22 | 14                       | 27.45 | 31                           | 60.78 | 6                          | 11.76 | <b>&lt; 0.001</b> |
| 2                                                                                                                                            | 47                 | 43.52 | 2                        | 4.26  | 32                           | 68.09 | 13                         | 27.66 |                   |
| 3                                                                                                                                            | 10                 | 9.26  | 0                        | 0.00  | 1                            | 10.00 | 9                          | 90.00 |                   |
| <b>Necrosis</b>                                                                                                                              |                    |       |                          |       |                              |       |                            |       |                   |
| -                                                                                                                                            | 28                 | 25.93 | 4                        | 14.29 | 17                           | 60.71 | 7                          | 25.00 | 0.984             |
| +                                                                                                                                            | 80                 | 74.07 | 12                       | 15.00 | 47                           | 58.75 | 21                         | 26.25 |                   |
| <b>Calcification</b>                                                                                                                         |                    |       |                          |       |                              |       |                            |       |                   |
| -                                                                                                                                            | 78                 | 72.22 | 12                       | 15.38 | 50                           | 64.10 | 16                         | 20.51 | 0.114             |
| +                                                                                                                                            | 30                 | 27.78 | 4                        | 13.33 | 14                           | 46.67 | 12                         | 40.00 |                   |
| * G2 ignored, because of only two patients with G2 tumors;                                                                                   |                    |       |                          |       |                              |       |                            |       |                   |
| HPF – high power field (400-fold magnification);                                                                                             |                    |       |                          |       |                              |       |                            |       |                   |
| CHT response: CR – complete response, PR – partial response, NC – no change, P - progression                                                 |                    |       |                          |       |                              |       |                            |       |                   |
| O – tumor section containing ovarian structure(s), T – section with tumor tissue only, P – section containing peritoneal/omental structures; |                    |       |                          |       |                              |       |                            |       |                   |
| Fibronectin expression: weak – score 1, moderate – score 2, strong – score 3                                                                 |                    |       |                          |       |                              |       |                            |       |                   |

### A. Stromal fibronectin expression

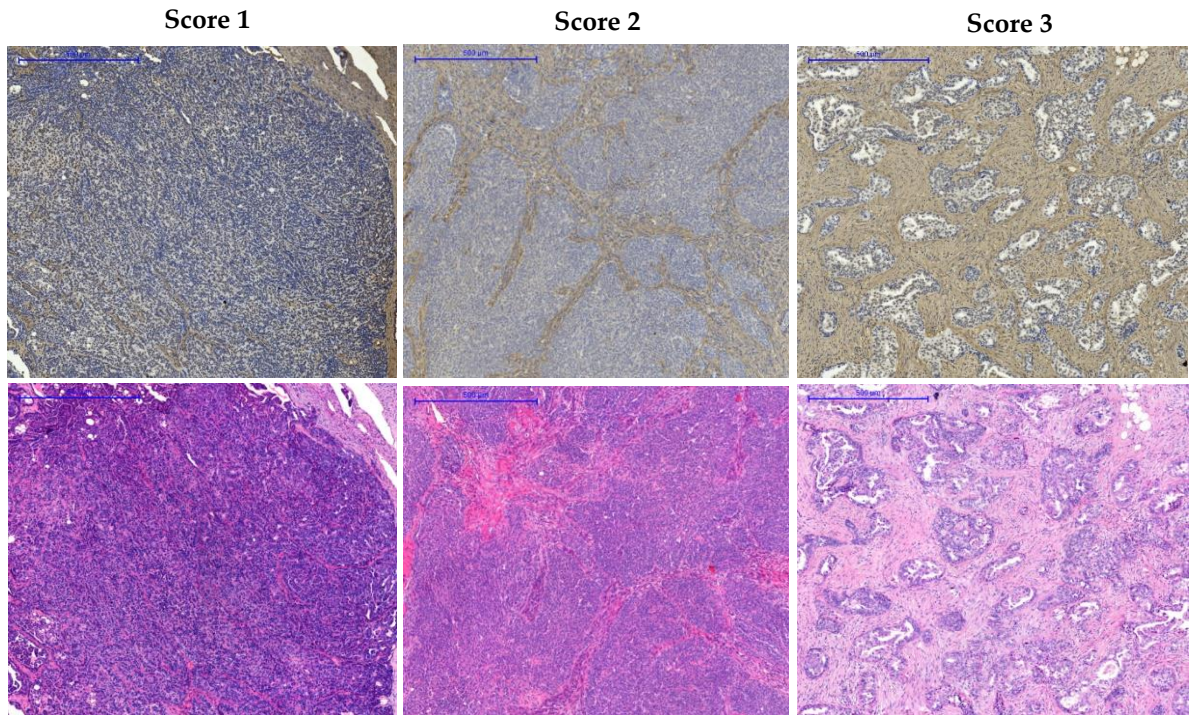

### B. Nuclear fibronectin staining

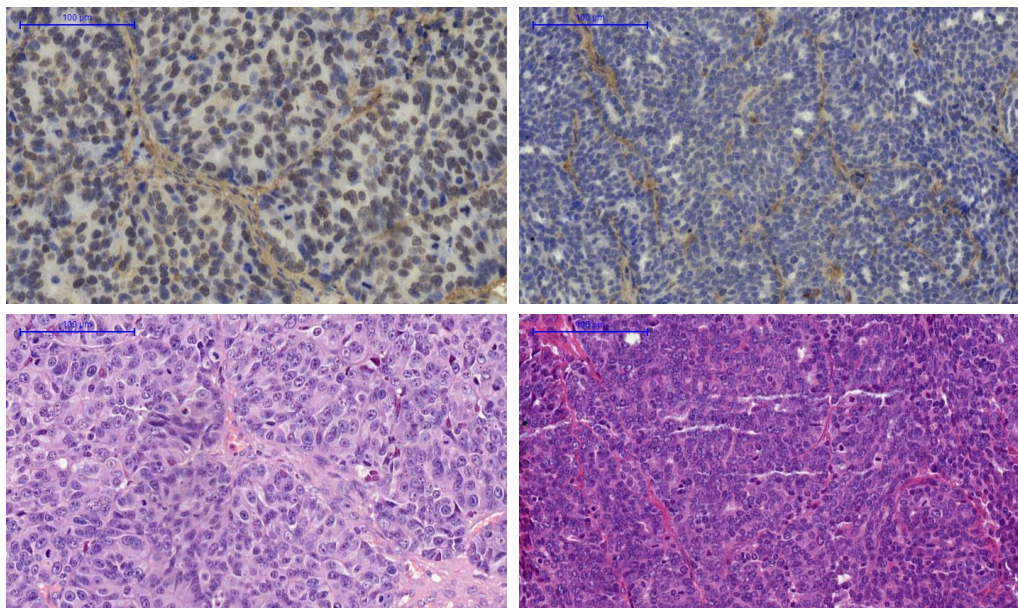

**Figure S1.** Immunohistochemical detection of fibronectin in ovarian cancer samples. A. IHC images (upper panel) show representative examples of stromal fibronectin staining, scored as 1 (weak expression), 2 (moderate expression), and 3 (strong expression); lower panel contains corresponding H&E images; B. Images in the upper panel show representative example of nuclear anti-FN1 staining in cancer cells (image on the left) and lack of nuclear staining in cancer cells (image on the right). Lower panel contains corresponding H&E images; Panoramic 250 Flash II Scanner, scale bar: 500 μm (images in A) and 100 μm (images in B).

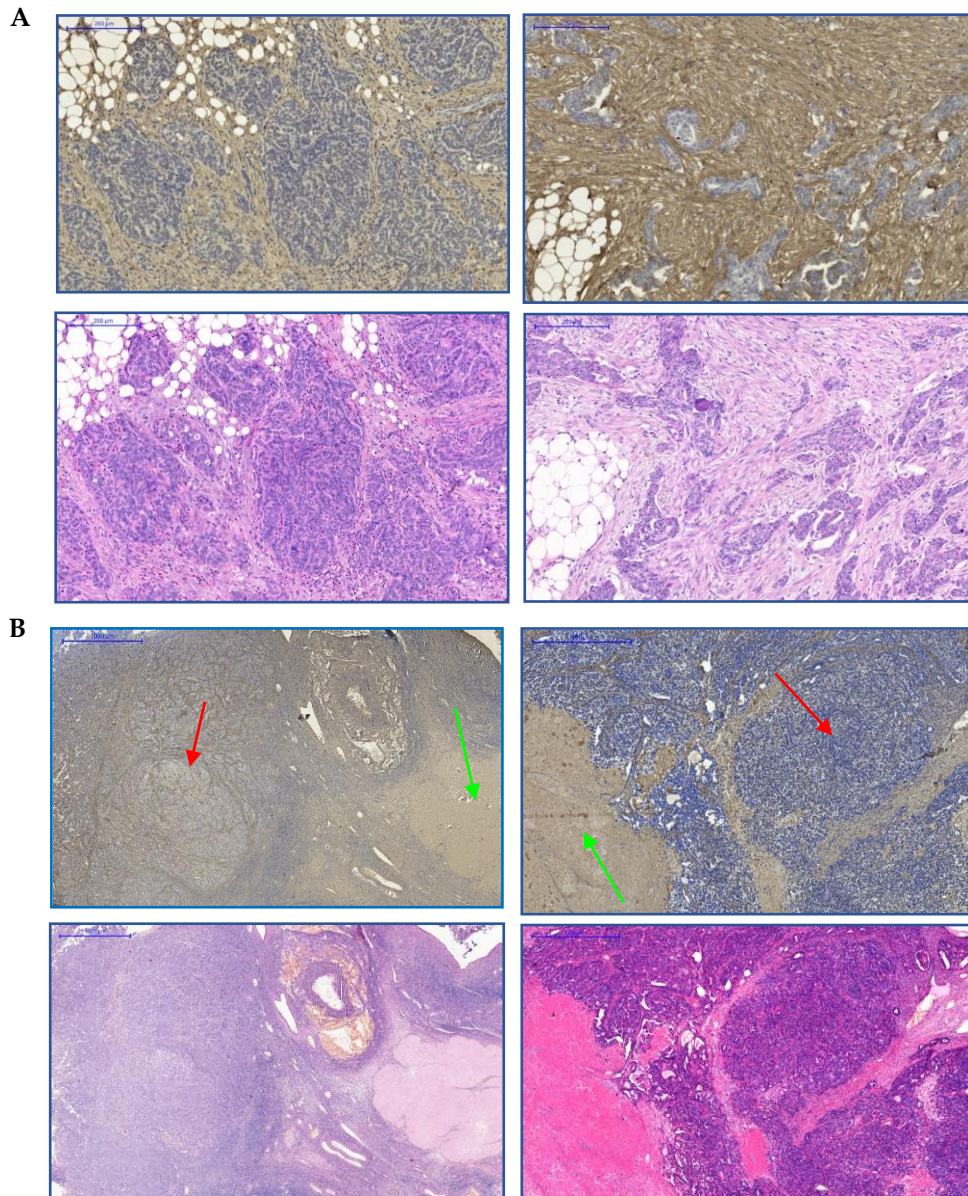

**Figure S2.** A. Examples of specimens derived from omental metastatic disease (P) with strong fibronectin expression (upper panel) and corresponding H&E images (lower panel); B. Upper panel: examples of specimens containing ovarian structures (O), green arrows indicate whitish corpuscles, red arrows indicate nests of cancer cells; lower panel: corresponding H&E images. Panoramic 250 Flash II Scanner, scale bar: 200 µm (images in A), 1000 µm and 500 µm (images in B).

TableS2. Association between periostin expression and clinico-pathological features ( $\chi^2$  test).

| Characteristics                               | Number of patients |       | POSTN expression in cancer cells |       |                       |        | P value | POSTN expression in tumor stroma |       |                         |       |                       |       | P value      |
|-----------------------------------------------|--------------------|-------|----------------------------------|-------|-----------------------|--------|---------|----------------------------------|-------|-------------------------|-------|-----------------------|-------|--------------|
|                                               |                    |       | weak<br>(n=28, 25.9%)            |       | strong<br>(n=80, 74%) |        |         | weak<br>(n=61, 56.5%)            |       | moderate<br>(n=40, 37%) |       | strong<br>(n=7, 6.5%) |       |              |
|                                               | n                  | %     | n                                | %     | n                     | %      |         | n                                | %     | n                       | %     | n                     | %     |              |
| <b>Age</b>                                    |                    |       |                                  |       |                       |        |         |                                  |       |                         |       |                       |       |              |
| ≤ 54 years                                    | 56                 | 51.85 | 15                               | 26.79 | 41                    | 73.21  | 0.832   | 33                               | 58.93 | 20                      | 35.71 | 3                     | 5.36  | 0.817        |
| > 54 years                                    | 52                 | 48.15 | 13                               | 25.00 | 39                    | 75.00  |         | 28                               | 53.85 | 20                      | 38.46 | 4                     | 7.69  |              |
| <b>Residual disease</b>                       |                    |       |                                  |       |                       |        |         |                                  |       |                         |       |                       |       |              |
| No                                            | 17                 | 15.74 | 7                                | 41.18 | 10                    | 58.82  | 0.118   | 13                               | 76.47 | 3                       | 17.65 | 1                     | 5.88  | 0.175        |
| Yes                                           | 91                 | 84.26 | 21                               | 23.08 | 70                    | 76.92  |         | 48                               | 52.75 | 37                      | 40.66 | 6                     | 6.59  |              |
| <b>Grade*</b>                                 |                    |       |                                  |       |                       |        |         |                                  |       |                         |       |                       |       |              |
| G3                                            | 76                 | 71.70 | 19                               | 25.00 | 57                    | 75.00  | 0.599   | 40                               | 52.63 | 32                      | 42.11 | 4                     | 5.26  | 0.196        |
| G4                                            | 30                 | 28.30 | 9                                | 30.00 | 21                    | 70.00  |         | 21                               | 70.00 | 7                       | 23.33 | 2                     | 6.67  |              |
| <b>Platinum sensitivity</b>                   |                    |       |                                  |       |                       |        |         |                                  |       |                         |       |                       |       |              |
| Highly sensitive (DFS > 24 mths)              | 22                 | 20.37 | 6                                | 27.27 | 16                    | 72.73  | 0.815   | 14                               | 63.64 | 6                       | 27.27 | 2                     | 9.09  | 0.342        |
| Moderately sensitive (24 mths > DFS > 6 mths) | 42                 | 38.89 | 12                               | 28.57 | 30                    | 71.43  |         | 21                               | 50.00 | 20                      | 47.62 | 1                     | 2.38  |              |
| Resistant (DFS < 6 mths)                      | 44                 | 40.74 | 10                               | 22.73 | 34                    | 77.27  |         | 26                               | 59.09 | 14                      | 31.82 | 4                     | 9.09  |              |
| <b>TP53 Accumulation</b>                      |                    |       |                                  |       |                       |        |         |                                  |       |                         |       |                       |       |              |
| -                                             | 40                 | 37.04 | 8                                | 20.00 | 32                    | 80.00  | 0.281   | 21                               | 52.50 | 16                      | 40.00 | 3                     | 7.50  | 0.806        |
| +                                             | 68                 | 62.96 | 20                               | 29.41 | 48                    | 70.59  |         | 40                               | 58.82 | 24                      | 35.29 | 4                     | 5.88  |              |
| <b>CHT response</b>                           |                    |       |                                  |       |                       |        |         |                                  |       |                         |       |                       |       |              |
| CR                                            | 74                 | 68.52 | 19                               | 25.68 | 55                    | 74.32  | 0.546   | 41                               | 55.41 | 30                      | 40.54 | 3                     | 4.05  | 0.446        |
| PR                                            | 31                 | 28.70 | 9                                | 29.03 | 22                    | 70.97  |         | 18                               | 58.06 | 9                       | 29.03 | 4                     | 12.90 |              |
| NC or P                                       | 3                  | 2.78  | 0                                | 0.00  | 3                     | 100.00 |         | 2                                | 66.67 | 1                       | 33.33 | 0                     | 0.00  |              |
| <b>Growth type</b>                            |                    |       |                                  |       |                       |        |         |                                  |       |                         |       |                       |       |              |
| Papillary                                     | 17                 | 15.74 | 2                                | 11.76 | 15                    | 88.24  | 0.345   | 9                                | 52.94 | 4                       | 23.53 | 4                     | 23.53 | <b>0.022</b> |
| Solid                                         | 34                 | 31.48 | 10                               | 29.41 | 24                    | 70.59  |         | 17                               | 50.00 | 15                      | 44.12 | 2                     | 5.88  |              |
| Mixed                                         | 57                 | 52.78 | 16                               | 28.07 | 41                    | 71.93  |         | 35                               | 61.40 | 21                      | 36.84 | 1                     | 1.75  |              |
| <b>Mitotic activity</b>                       |                    |       |                                  |       |                       |        |         |                                  |       |                         |       |                       |       |              |
| 1 (0-9/10HPF)                                 | 11                 | 10.19 | 2                                | 18.18 | 9                     | 81.82  | 0.816   | 5                                | 45.45 | 5                       | 45.45 | 1                     | 9.09  | 0.396        |
| 2 (10-24/10HPF)                               | 25                 | 23.15 | 7                                | 28.00 | 18                    | 72.00  |         | 11                               | 44.00 | 11                      | 44.00 | 3                     | 12.00 |              |
| 3 (> 24/10HPF)                                | 72                 | 66.67 | 19                               | 26.39 | 53                    | 73.61  |         | 45                               | 62.50 | 24                      | 33.33 | 3                     | 4.17  |              |

| Characteristics                        | Number of patients |       | POSTN expression in cancer cells |       |                       |       | P value      | POSTN expression in tumor stroma |       |                         |       |                       |       | P value           |
|----------------------------------------|--------------------|-------|----------------------------------|-------|-----------------------|-------|--------------|----------------------------------|-------|-------------------------|-------|-----------------------|-------|-------------------|
|                                        |                    |       | weak<br>(n=28, 25.9%)            |       | strong<br>(n=80, 74%) |       |              | weak<br>(n=61, 56.5%)            |       | moderate<br>(n=40, 37%) |       | strong<br>(n=7, 6.5%) |       |                   |
|                                        | n                  | %     | n                                | %     | n                     | %     |              | n                                | %     | n                       | %     | n                     | %     |                   |
| <b>Source of tumor sample</b>          |                    |       |                                  |       |                       |       |              |                                  |       |                         |       |                       |       |                   |
| Ovary (O)                              | 39                 | 36.11 | 8                                | 20.51 | 31                    | 79.49 | 0.459        | 25                               | 64.10 | 12                      | 30.77 | 2                     | 5.13  | 0.138             |
| Tumor (T)                              | 33                 | 30.56 | 11                               | 33.33 | 22                    | 66.67 |              | 22                               | 66.67 | 9                       | 27.27 | 2                     | 6.06  |                   |
| Peritoneum (P)                         | 36                 | 33.33 | 9                                | 25.00 | 27                    | 75.00 |              | 14                               | 38.89 | 19                      | 52.78 | 3                     | 8.33  |                   |
| O + T                                  | 72                 | 66.67 | 19                               | 26.39 | 53                    | 73.61 | 0.877        | 47                               | 65.28 | 21                      | 29.17 | 4                     | 5.56  | <b>0.032</b>      |
| P                                      | 36                 | 33.33 | 9                                | 25.00 | 27                    | 75.00 |              | 14                               | 38.89 | 19                      | 52.78 | 3                     | 8.33  |                   |
| <b>Inflammatory infiltration</b>       |                    |       |                                  |       |                       |       |              |                                  |       |                         |       |                       |       |                   |
| Weak                                   | 81                 | 75.00 | 20                               | 24.69 | 61                    | 75.31 | 0.612        | 44                               | 54.32 | 30                      | 37.04 | 7                     | 8.64  | 0.272             |
| Moderate + Strong                      | 27                 | 25.00 | 8                                | 29.63 | 19                    | 70.37 |              | 17                               | 62.96 | 10                      | 37.04 | 0                     | 0.00  |                   |
| <b>Degree of desmoplastic reaction</b> |                    |       |                                  |       |                       |       |              |                                  |       |                         |       |                       |       |                   |
| 1                                      | 51                 | 47.22 | 19                               | 37.25 | 32                    | 62.75 | <b>0.037</b> | 35                               | 68.63 | 15                      | 29.41 | 1                     | 1.96  | <b>&lt; 0.001</b> |
| 2                                      | 47                 | 43.52 | 7                                | 14.89 | 40                    | 85.11 |              | 25                               | 53.19 | 20                      | 42.55 | 2                     | 4.26  |                   |
| 3                                      | 10                 | 9.26  | 2                                | 20.00 | 8                     | 80.00 |              | 1                                | 10.00 | 5                       | 50.00 | 4                     | 40.00 |                   |
| <b>Necrosis</b>                        |                    |       |                                  |       |                       |       |              |                                  |       |                         |       |                       |       |                   |
| -                                      | 28                 | 25.93 | 5                                | 17.86 | 23                    | 82.14 | 0.258        | 19                               | 67.86 | 7                       | 25.00 | 2                     | 7.14  | 0.306             |
| +                                      | 80                 | 74.07 | 23                               | 28.75 | 57                    | 71.25 |              | 42                               | 52.50 | 33                      | 41.25 | 5                     | 6.25  |                   |
| <b>Calcification</b>                   |                    |       |                                  |       |                       |       |              |                                  |       |                         |       |                       |       |                   |
| -                                      | 78                 | 72.22 | 25                               | 32.05 | 53                    | 67.95 | <b>0.019</b> | 46                               | 58.97 | 28                      | 35.90 | 4                     | 5.13  | 0.548             |
| +                                      | 30                 | 27.78 | 3                                | 10.00 | 27                    | 90.00 |              | 15                               | 50.00 | 12                      | 40.00 | 3                     | 10.00 |                   |

\* G2 ignored, because of only two patients with G2;

HPF – high power field (400-fold magnification);

CHT response: CR – complete response, PR – partial response, NC – no change, P – progression;

O – tumor section containing ovarian structure(s), T – section with tumor tissue only, P – section containing peritoneal/omental structures;

Stromal periostin expression: weak – score 1, moderate – score 2, strong – score 3

### Periostin expression in cancer cells

Weak

Strong

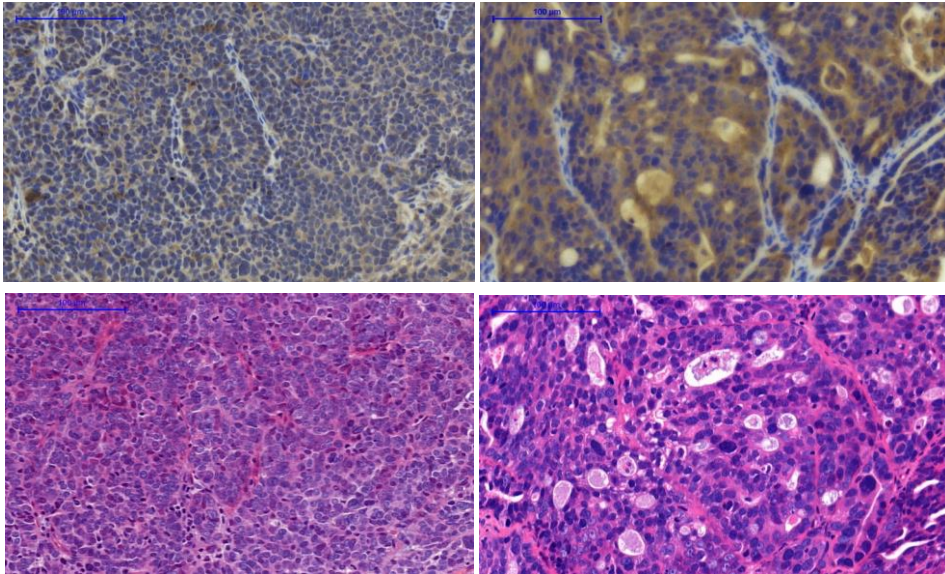

### Periostin expression in the tumor stroma

Score 1

Score 2

Score 3

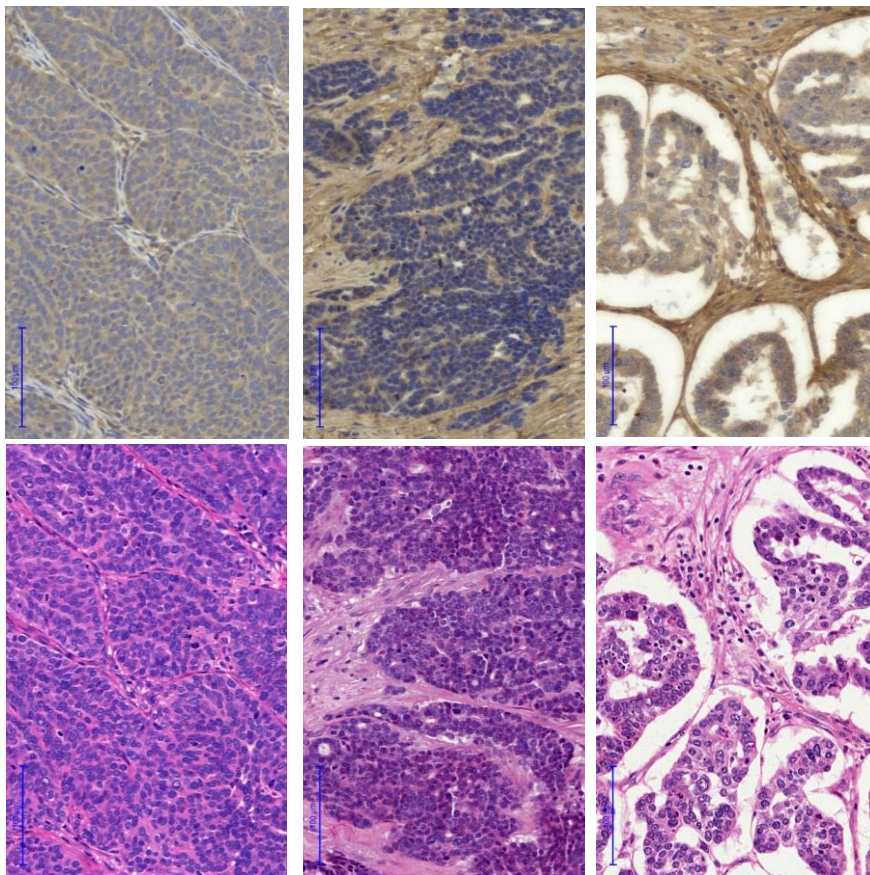

**Figure S3.** Immunohistochemical detection of periostin. Periostin expression was evaluated separately in cancer cells (upper panel) and in the tumor stroma (lower panel). Images show IHC staining in cancer cells scored either as “weak” or “strong” (below are shown corresponding H&E images), and IHC staining of stromal periostin scored 1 – 3 (below are shown corresponding H&E images). Pannoramic 250 Flash II Scanner, scale bar: 100 µm.

## Overall survival

## Disease-free survival

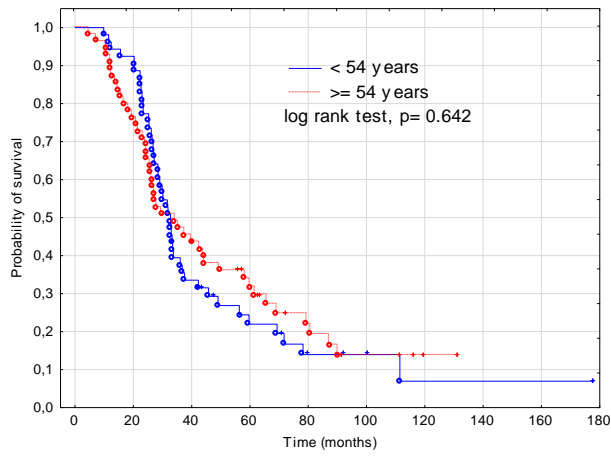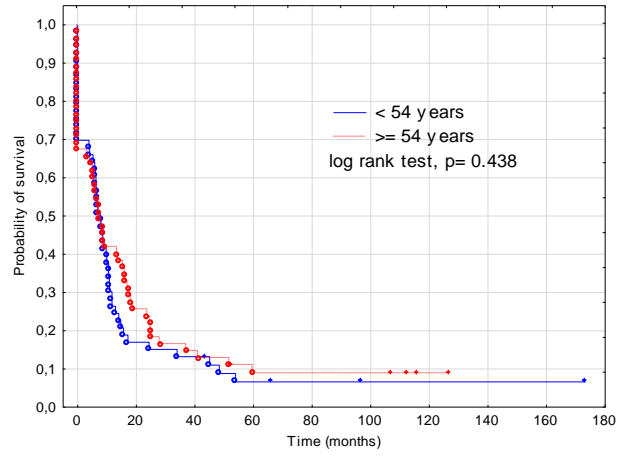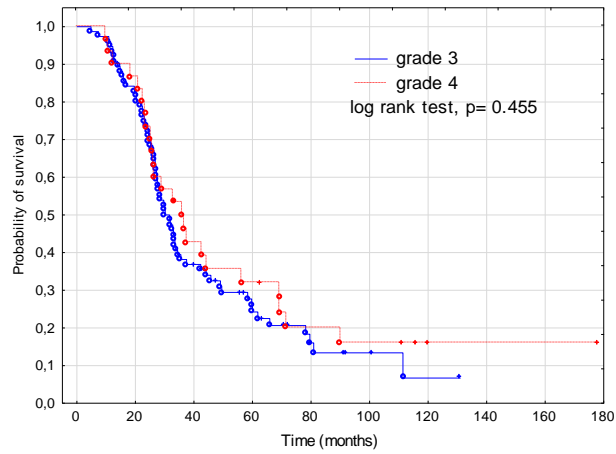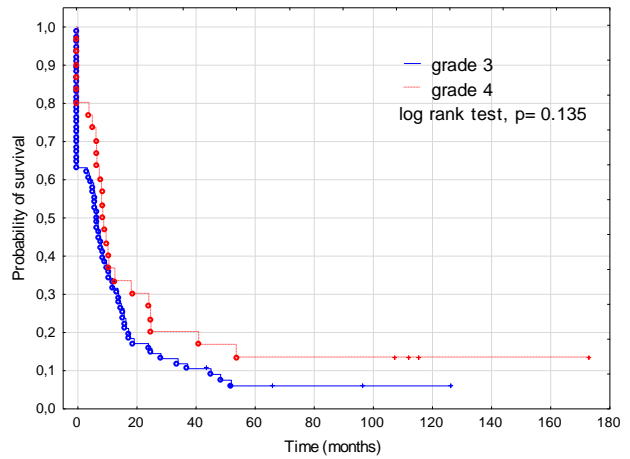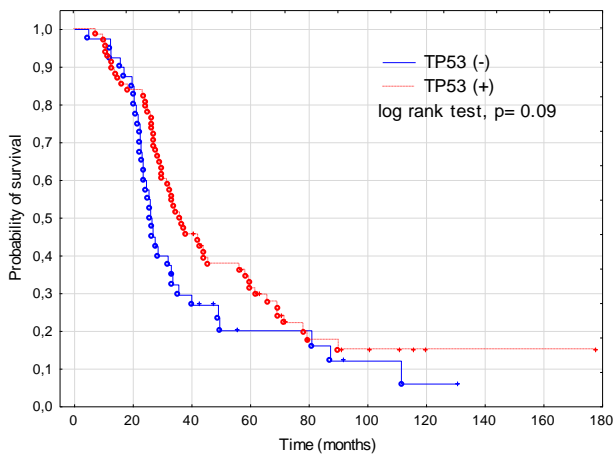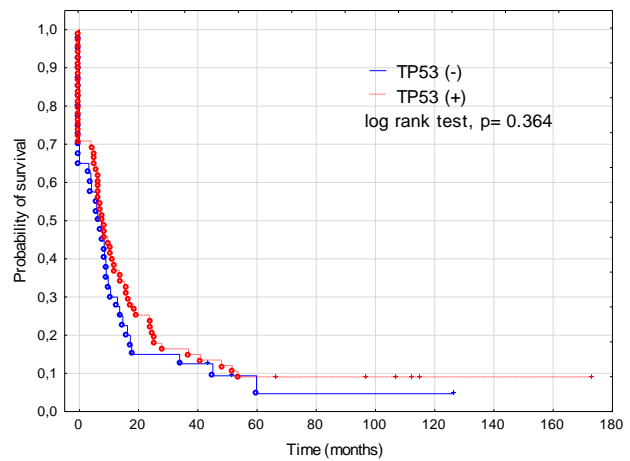

**Figure S4.** Kaplan-Meier analysis of overall survival (OS) and disease-free survival (DFS) in 108 patients in regard to following clinico-pathological features: age, grade, TP53 accumulation (all nonsignificant).



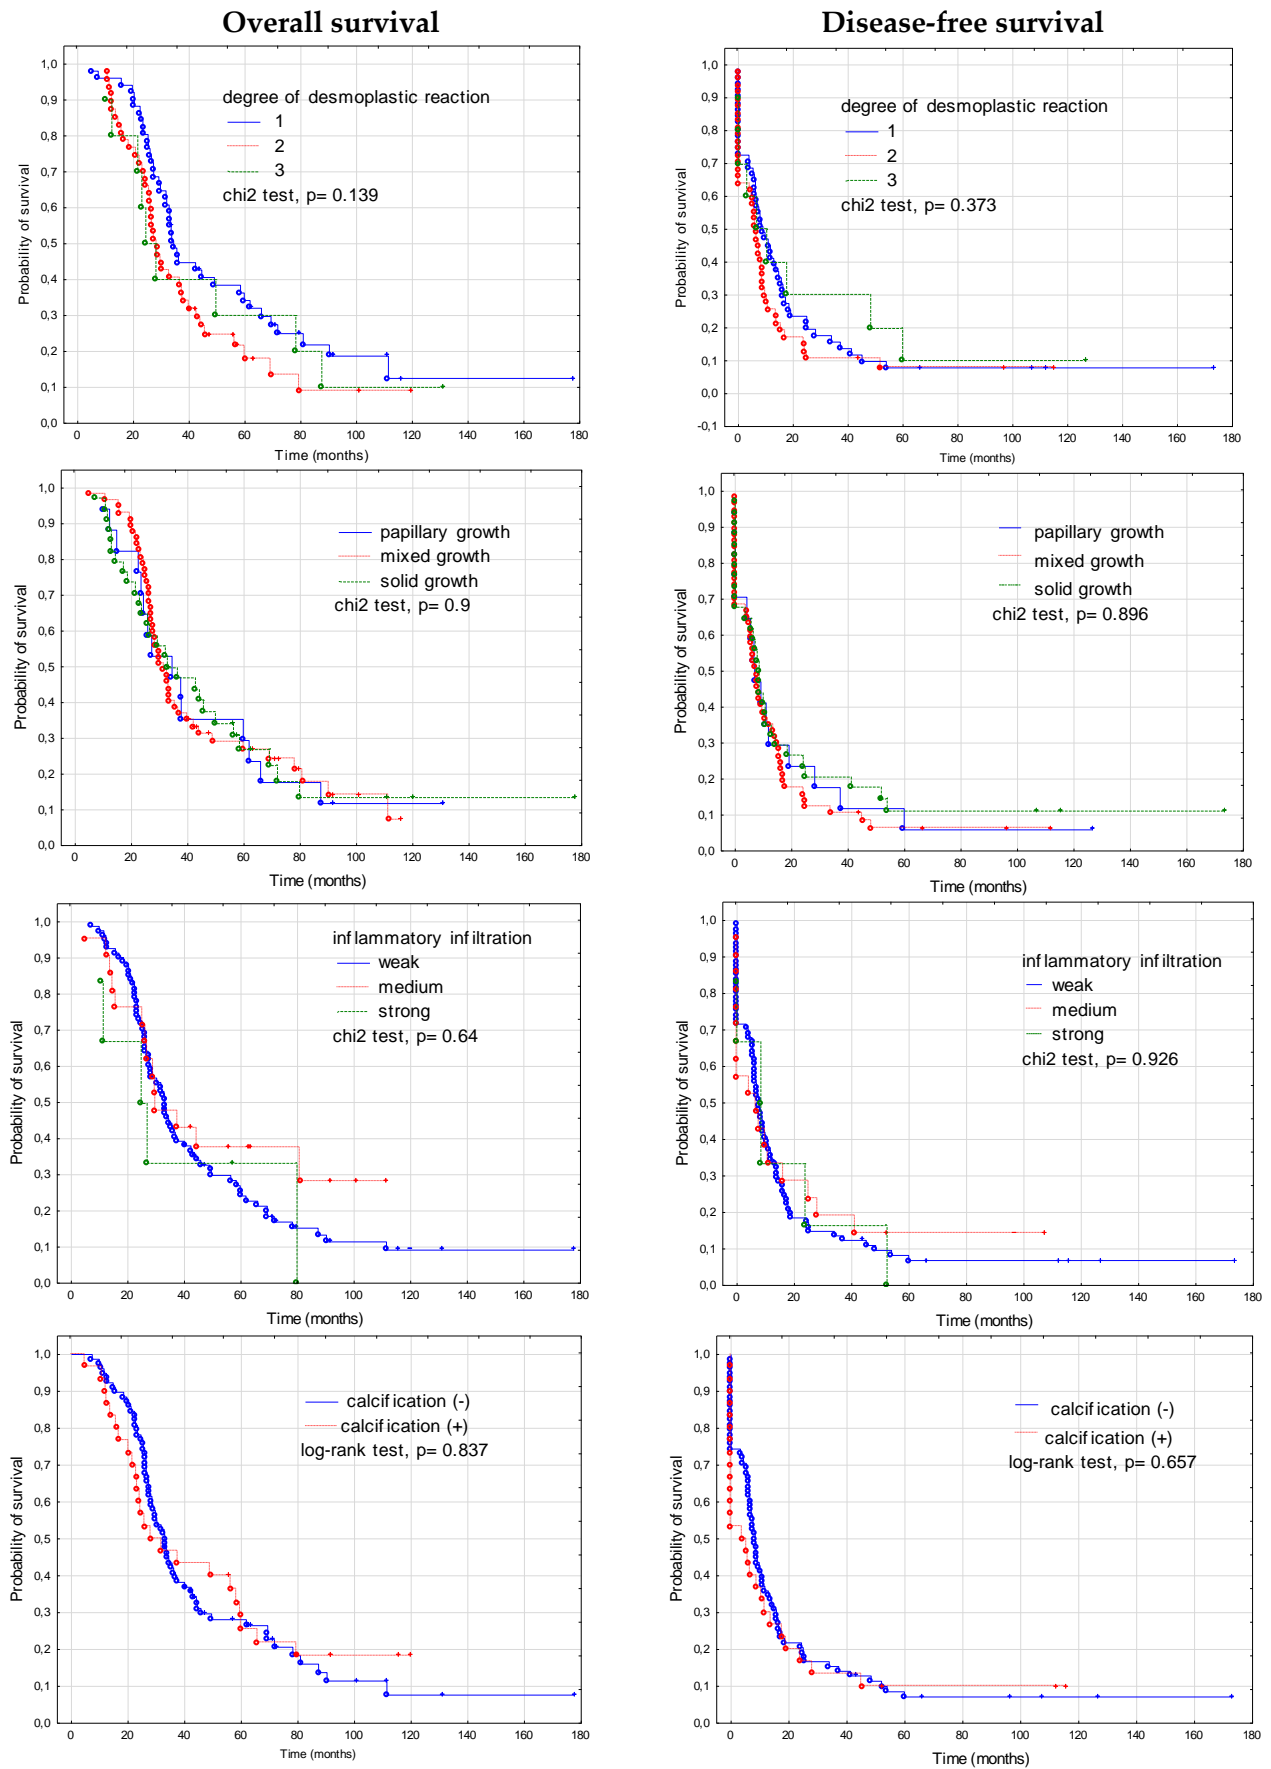

**Figure S4 (cont.).** Kaplan-Meier analysis of overall survival (OS) and disease-free survival (DFS) in 108 patients in regard to following clinic-pathological features: degree of desmoplastic reaction, type of tumor growth (papillary versus solid versus mixed), inflammatory infiltration, calcifications in the tumor (all nonsignificant).

## FN1&POSTN score and survival

| Stromal FN1 | Stromal POSTN | FN1&POSTN score | No. of samples | Median OS months                                                                  |
|-------------|---------------|-----------------|----------------|-----------------------------------------------------------------------------------|
| 1           | 1             | 2               | 14             | 55.88 (range 4.8-177.83)<br>After exclusion of the outlier:<br>range 32.93-177.83 |
| 1           | 2             | 3               | 2              | 30.92 (range 10.7-119.93)                                                         |
| 2           | 1             |                 | 42             |                                                                                   |
| 2           | 2             | 4               | 21             | 28.77 (range 7.3-100.83)                                                          |
| 1           | 3             |                 | 0              |                                                                                   |
| 3           | 1             | 5               | 5              | 26.55 (range 11.53-91.53)                                                         |
| 2           | 3             |                 | 1              |                                                                                   |
| 3           | 2             | 6               | 17             | 42.23 (range 9.87-131.17)<br>After exclusion of outlier: range<br>9.87-87.27      |
| 3           | 3             |                 | 6              |                                                                                   |

| Stromal FN1 | Stromal POSTN | FN1&POSTN score | No. of samples | Median OS months                                                              |
|-------------|---------------|-----------------|----------------|-------------------------------------------------------------------------------|
| 1           | 1             | 2               | 14             | 55.88 (range 4.8-177.83)<br>After exclusion of outlier:<br>range 32.93-177.83 |
| 1           | 2             | 3               | 2              | 30.92 (range 10.7-119.93)                                                     |
| 2           | 1             |                 | 42             |                                                                               |
| 2           | 2             | 4-6             | 21             | 27.63 (range 7.3-131.17)                                                      |
| 1           | 3             |                 | 0              |                                                                               |
| 3           | 1             | 5               | 5              | 26.55 (range 11.53-91.53)                                                     |
| 2           | 3             |                 | 1              |                                                                               |
| 3           | 2             | 6               | 17             | 42.23 (range 9.87-131.17)<br>After exclusion of outlier: range<br>9.87-87.27  |
| 3           | 3             |                 | 6              |                                                                               |

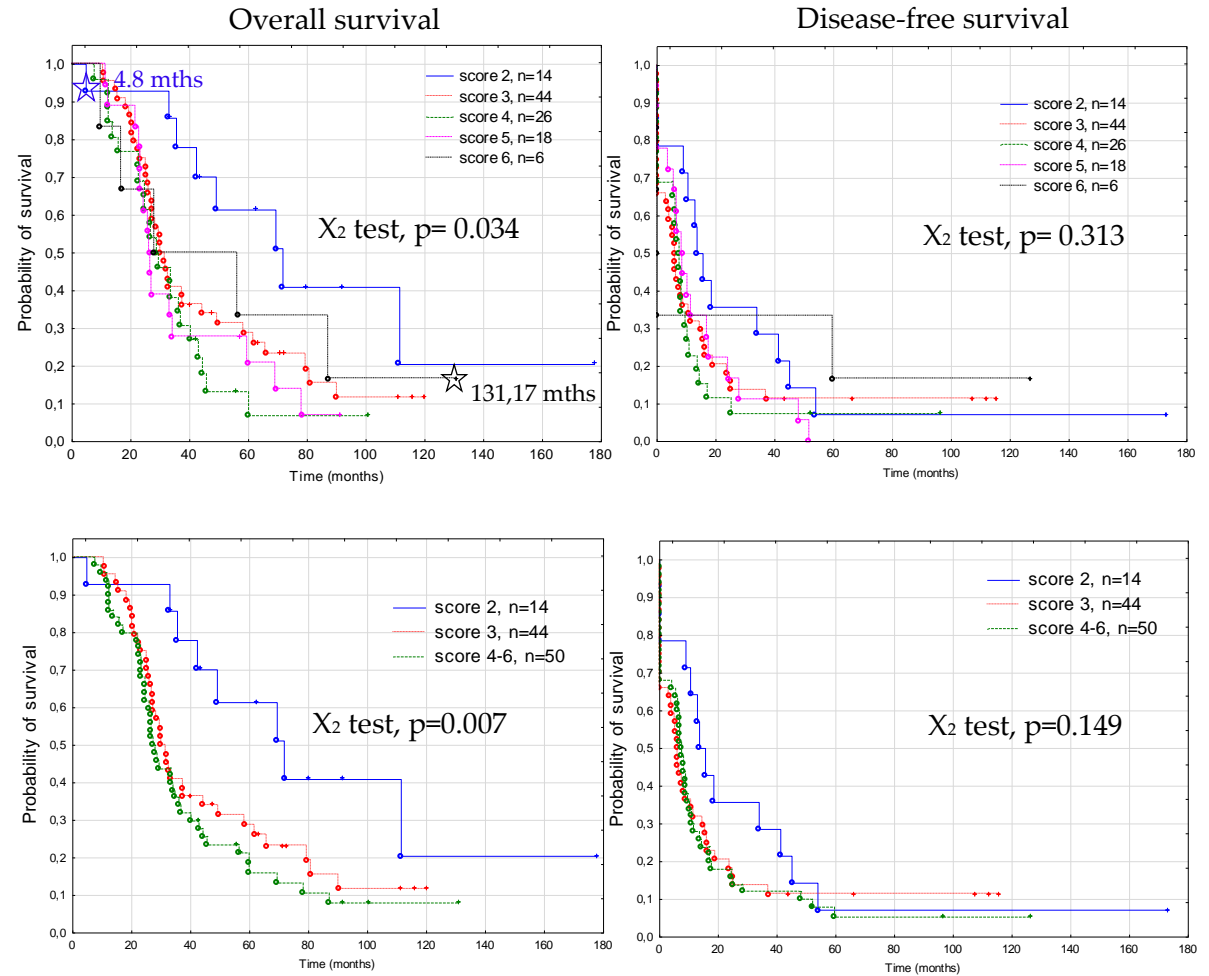

**Figure S5.** Kaplan-Meier analysis of overall survival (OS) and disease-free survival (DFS) in 108 patients stratified by combined FN1&POSTN score.

Upper panel: 5 groups of patients (score 2, 3, 4, 5, and 6, respectively). Blue asterisk indicates death of the protruding patient with score 2 (best prognosis), who had the shortest OS (4.8 months) from the whole cohort of 108 patients. Black asterisk indicates the protruding patient with score 6 tumor (worst prognosis) who had second longest OS (131,17 months, patient alive) in the whole cohort.

Lower panel: patients with score 2 tumors versus patients with score 3 tumors versus all remaining patients (score 3, 4, 5 and 6 together).

### FN1&POSTN score and survival

| Stromal FN1 | Stromal POSTN | FN1&POSTN score | No. of samples | Median OS months                                                              |
|-------------|---------------|-----------------|----------------|-------------------------------------------------------------------------------|
| 1           | 1             | 2               | 14             | 55.88 (range 4.8-177.83)<br>After exclusion of outlier:<br>range 32.93-177.83 |
| 1           | 2             | 3-6             | 2              | 29.07 (range 7.3-131.17)                                                      |
| 2           | 1             |                 | 42             |                                                                               |
| 2           | 2             |                 | 21             |                                                                               |
| 1           | 3             |                 | 0              |                                                                               |
| 3           | 1             |                 | 5              |                                                                               |
| 2           | 3             |                 | 1              |                                                                               |
| 3           | 2             |                 | 17             |                                                                               |
| 3           | 3             |                 | 6              |                                                                               |

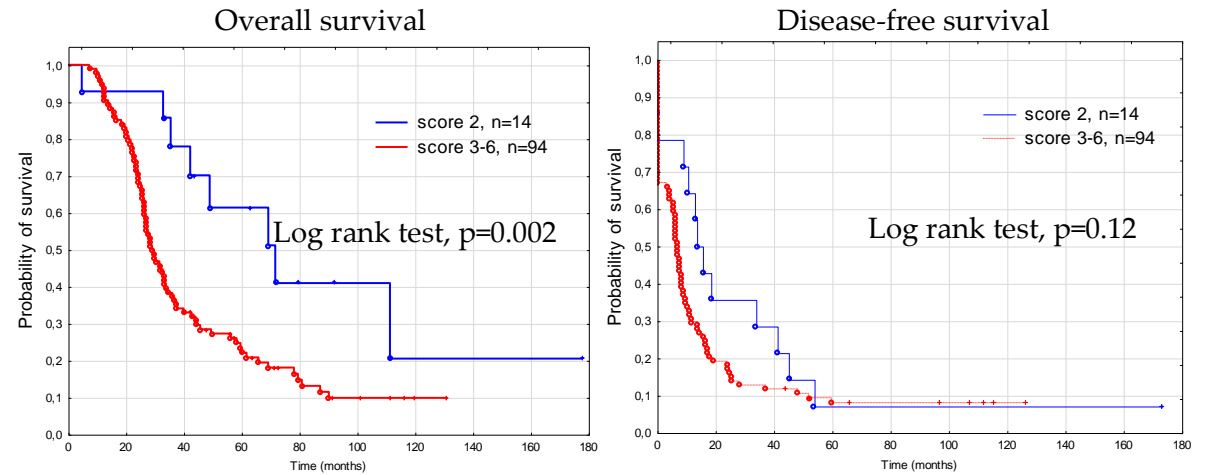

**Figure S5 (cont.).** Kaplan-Meier analysis of overall survival (OS) and disease-free survival (DFS) in 108 patients stratified by combined FN1&POSTN score: patients with score 2 tumors versus all remaining patients (score 3, 4, 5 and 6 together).
